# Supplementary material for: Investigation of the sulfur speciation in petroleum products by capillary gas chromatography with ICP-collision cell-MS detection
Source: Royal Society of Chemistry journal article supplement (doi:10.1039/b310449d), 2004-01-01
Supplement: caption.doc [file caption.doc]

**Fig. S1** Chromatogram of sulfur containing compounds petroleum sample, 32S signal for: (a) light cycle oil B; (b) light cycle oil C; (c) light cycle oil D; (d) oil-fired boiler oil; (e) commercial fuel oil; (f) commercial lead-free gasoline.
